# Supplementary material for: Mechanochemical solid state anion-exchange of lead(ii) coordination polymers via an intermediate coordination polymer; new precursors for the preparation of PbBr2/Pb3O2Br2, PbBr(OH) and PbO nanoparticles
Source: Royal Society of Chemistry journal article supplement (doi:10.1039/c3dt51533h), 2013-10-23
Supplement: c3dt51533h.pdf [file c3dt51533h.pdf]

**Electronic Supplementary Information for MS:**

**Mechanochemical Solid State Anion-exchange of Lead(II)  
Coordination Polymer via Intermediate Coordination Polymer; New  
Precursors for Preparation of PbBr<sub>2</sub>/ Pb<sub>3</sub>O<sub>2</sub>Br<sub>2</sub>, PbBr(OH) and PbO  
Nanoparticles**

**Lida Hashemi<sup>a</sup>, Ali Morsali<sup>a\*</sup>, Sang Woo Joo<sup>b\*</sup>**

<sup>a</sup>Department of Chemistry, Faculty of Sciences, Tarbiat Modares University, P.O. Box 14115-175,  
Tehran, Islamic Republic of Iran

<sup>b</sup>School of Mechanical Engineering, WCU Nano Research Center, Yeungnam University, Gyongsan  
712–749, South Korea

## ‡ Experimental section:

### *Synthesis of coordination polymers 1, 2 and 3 with branched tube method:*

Single crystals of compound **1** suitable for X-ray diffraction were prepared by a thermal gradient method in branched tube. The ligand 4-bpdh (1 mmol, 0.238g), lead(II) nitrate (0.331g, 1mmol) and KBr (2 mmol 0.119g) were placed in the main arm of a branched tube. Methanol was carefully added to fill both arms. The tube was sealed and the ligand-containing arm immersed in an oil bath at 60°C while the other arm was kept at ambient temperature. After 4 days, crystals deposited in the cooler arm that were isolated, filtered off and dried. M.p =240 °C. Found; C, 27.71; H, 2.40; N, 9.26%, calculated for C<sub>14</sub> H<sub>14</sub> Br<sub>2</sub> N<sub>4</sub> Pb; C, 27.75; H, 2.31; N, 9.25%. IR (cm<sup>-1</sup>) selected bonds:  $\nu$  = 574(w), 821(s), 1062(m), 1217(w), 1291(w), 1415(m), 1600(vs) and 3435(m) .

Single crystals of compound **2** suitable for X-ray diffraction were prepared by a thermal gradient method in branched tube. The ligand 4-bpdh (1 mmol, 0.238g), lead(II) nitrate (0.331g, 1mmol) and KBr (1 mmol 0.119g) were placed in the main arm of a branched tube. Methanol was carefully added to fill both arms. The tube was sealed and the ligand-containing arm immersed in an oil bath at 60°C while the other arm was kept at ambient temperature. After 3 days, crystals deposited in the cooler arm that were isolated, filtered off and dried. M.p =250 °C. Found; C, 28.55; H, 2.40; N, 11.70%, calculated for C<sub>28</sub>H<sub>28</sub> Br<sub>2.16</sub>N<sub>9.84</sub>O<sub>5.50</sub>Pb<sub>2</sub>; C, 28.53; H, 2.37; N, 11.69%. IR (cm<sup>-1</sup>) selected bonds:  $\nu$  = 576(m), 824(s), 1059(w), 1297(m), 1394(s), 1590(vs) and 3031(w) .

Single crystals of compound **3** suitable for X-ray diffraction were prepared by a thermal gradient method in branched tube. The ligand 4-bpdh (1 mmol, 0.238g) and lead(II) nitrate (0.331g, 1mmol) were placed in the main arm of a branched tube. Methanol was carefully added to fill both arms. The tube was sealed and the ligand-containing arm immersed in an oil bath at 60°C while the other arm was kept at ambient temperature. After 2-3 days, crystals deposited in the cooler arm that were isolated, filtered off and dried. M.p =290 °C. Found; C, 28.65; H, 2.40; N, 14.35%, calculated for C<sub>14</sub>H<sub>14</sub>C<sub>10</sub>N<sub>6</sub>O<sub>7</sub>Pb; C, 28.69; H, 2.39; N, 14.34%. IR (cm<sup>-1</sup>) selected bonds:  $\nu$  = 575(w), 825(s), 1055(m), 1293(s), 1372(vs), 1544(w), 1599(s) and 3384(m) .

***Synthesis of coordination polymers 1, 2 and 3 with mechanochemical manner:***

Compound **3** is synthesized from grinding of raw materials for 20 minutes in an agate mortar. the 3D  $[\text{Pb}(4\text{-bpdh})(\text{NO}_3)_2(\text{H}_2\text{O})]_n$  (**3**) polymerizes on grinding the solid with 1 and 2 mmol of KBr for 20 min in an agate mortar and pestle to form 3D coordination polymer,  $[\text{Pb}(4\text{-bpdh})(\text{Br})(\text{NO}_3)]_n$  (**2**) and 1D coordination polymer  $[\text{Pb}(4\text{-bpdh})(\text{Br})_2]_n$  (**1**), respectively. These powder samples separated by washing.

***Synthesis of PbO, PbBr(OH), Pb<sub>3</sub>O<sub>2</sub>Br<sub>2</sub> and PbBr<sub>2</sub> nanoparticles by thermal decomposition of coordination polymers 1, 2 and 3, respectively, at oleic acid as a surfactant:***

Precursors **1-3** (0.1 mmol) were dispersed in oleic acid (1.58 ml) to form homogenous emulsion solutions. These solutions were degassed for 20 min and then heated to 190 °C for 2 h. At the end of the reaction, black precipitates for precursor **1-3** were formed. A small amount of toluene and a large excess of EtOH were added to the all of three reaction solutions and PbBr<sub>2</sub>, PbBr(OH), Pb<sub>3</sub>O<sub>2</sub>Br<sub>2</sub> and PbO nanoparticles were separated by centrifugation for the precursors **1**, **2** and **3**, respectively. The solids were washed with EtOH and dried under air atmosphere.

Orthorhombic PbO structure with the lattice parameters of  $a = 5.4903 \text{ \AA}$ ,  $c = 4.7520 \text{ \AA}$ ,  $Z = 4$  and S.G = Pcam which are in JCPDS card file No. 38-1477 after calcination of compound **3**; Orthorhombic PbBr(OH) with  $a = 7.3850 \text{ \AA}$  and  $z = 4$  which are in JCPDS card file No. 30-0697 and Orthorhombic Pb<sub>3</sub>O<sub>2</sub>Br<sub>2</sub> with  $a = 12.2520 \text{ \AA}$  and  $z = 4$  which are in JCPDS card file No. 87-1185 after calcination of compound **2**; PbBr<sub>2</sub> with the lattice parameters ( $a = 8.062 \text{ \AA}$ ,  $b = 9.5393 \text{ \AA}$ ,  $c = 4.7348 \text{ \AA}$ , S.G. = Pnam (62) and  $z = 4$ ) which are in JCPDS card file No. 31-0679 after calcination of compound **1**.

**Table S1** Crystal data and structure refinements for compounds 1-3.

| Identification code               | <b>1</b>                                                                   | <b>2</b>                                                                                               | <b>3</b>                                                                         |
|-----------------------------------|----------------------------------------------------------------------------|--------------------------------------------------------------------------------------------------------|----------------------------------------------------------------------------------|
| Empirical formula                 | C <sub>14</sub> H <sub>14</sub> Br <sub>2</sub> N <sub>4</sub> Pb          | C <sub>28</sub> H <sub>28</sub> Br <sub>2.16</sub> N <sub>9.84</sub> O <sub>5.50</sub> Pb <sub>2</sub> | C <sub>14</sub> H <sub>14</sub> C <sub>10</sub> N <sub>6</sub> O <sub>7</sub> Pb |
| Formula weight                    | 605.29                                                                     | 1177.72                                                                                                | 585.50                                                                           |
| Temperature(K)                    | 298                                                                        | 180(2)                                                                                                 | 296                                                                              |
| Wavelength                        | 0.71073                                                                    | 0.71073                                                                                                | 0.71073                                                                          |
| Crystal system                    | Monoclinic                                                                 | Triclinic                                                                                              | Monoclinic                                                                       |
| Space group                       | P2/c                                                                       | P-1                                                                                                    | P2/c                                                                             |
| Unit cell dimensions              | a = 15.179(4) Å<br>b = 4.2189(10) Å<br>c = 16.682(3) Å<br>β = 117.679(17)° | a = 8.3995(1) Å<br>b = 17.9496(3) Å<br>c = 27.9998(5) Å<br>β = 89.987(1)°                              | a = 29.5578(14) Å<br>b = 10.5995(6) Å<br>c = 7.5118(4) Å<br>β = 91.337(4)°       |
| Volume                            | 946.0(4) Å <sup>3</sup>                                                    | 3578.0(1) Å <sup>3</sup>                                                                               | 2352.8(2) Å <sup>3</sup>                                                         |
| Z                                 | 2                                                                          | 4                                                                                                      | 4                                                                                |
| Density (calculated)              | 2.125 g/m <sup>3</sup>                                                     | 2.186 Mg/m <sup>3</sup>                                                                                | 1.653 g/m <sup>3</sup>                                                           |
| F(000)                            | 556                                                                        | 2195                                                                                                   | 1112                                                                             |
| Theta range for data collection   | 2.45 to 25.29 °                                                            | 1.71 to 26.00°                                                                                         | 1.38 to 27.20 °                                                                  |
| Index ranges                      | -17 ≤ h ≤ 18<br>-4 ≤ k ≤ 5<br>-20 ≤ l ≤ 16                                 | -10 ≤ h ≤ 10<br>-22 ≤ k ≤ 22<br>-34 ≤ l ≤ 34                                                           | -33 ≤ h ≤ 37<br>-13 ≤ k ≤ 13<br>-8 ≤ l ≤ 9                                       |
| Reflections collected             | 1789                                                                       | 46625                                                                                                  | 4870                                                                             |
| Independent reflections           | 1689                                                                       | 14031                                                                                                  | 3215                                                                             |
| Absorption correction             | Integration                                                                | Multi-scan                                                                                             | Integration                                                                      |
| Refinement method                 | F <sup>2</sup> > 2sigma(F <sup>2</sup> )                                   | Full-matrix least-squares on F <sup>2</sup>                                                            | F <sup>2</sup> > 2sigma(F <sup>2</sup> )                                         |
| Data / restraints / parameters    | 1789 / 0 / 97                                                              | 14031 / 14 / 630                                                                                       | 4870 / 24 / 255                                                                  |
| Goodness-of-fit on F <sup>2</sup> | 1.216                                                                      | 1.022                                                                                                  | 0.985                                                                            |
| Final R indices [I > 2σ(I)]       | R <sub>1</sub> = 0.0466 and<br>wR <sub>2</sub> = 0.1077                    | R <sub>1</sub> = 0.0346 and wR <sub>2</sub> = 0.0787                                                   | R <sub>1</sub> = 0.0443 and<br>wR <sub>2</sub> = 0.0884                          |
| R Indices (all data)              | R <sub>1</sub> = 0.0530 and<br>wR <sub>2</sub> = 0.1235                    | R <sub>1</sub> = 0.0651 and wR <sub>2</sub> = 0.0926                                                   | R <sub>1</sub> = 0.0792 and<br>wR <sub>2</sub> = 0.0963                          |

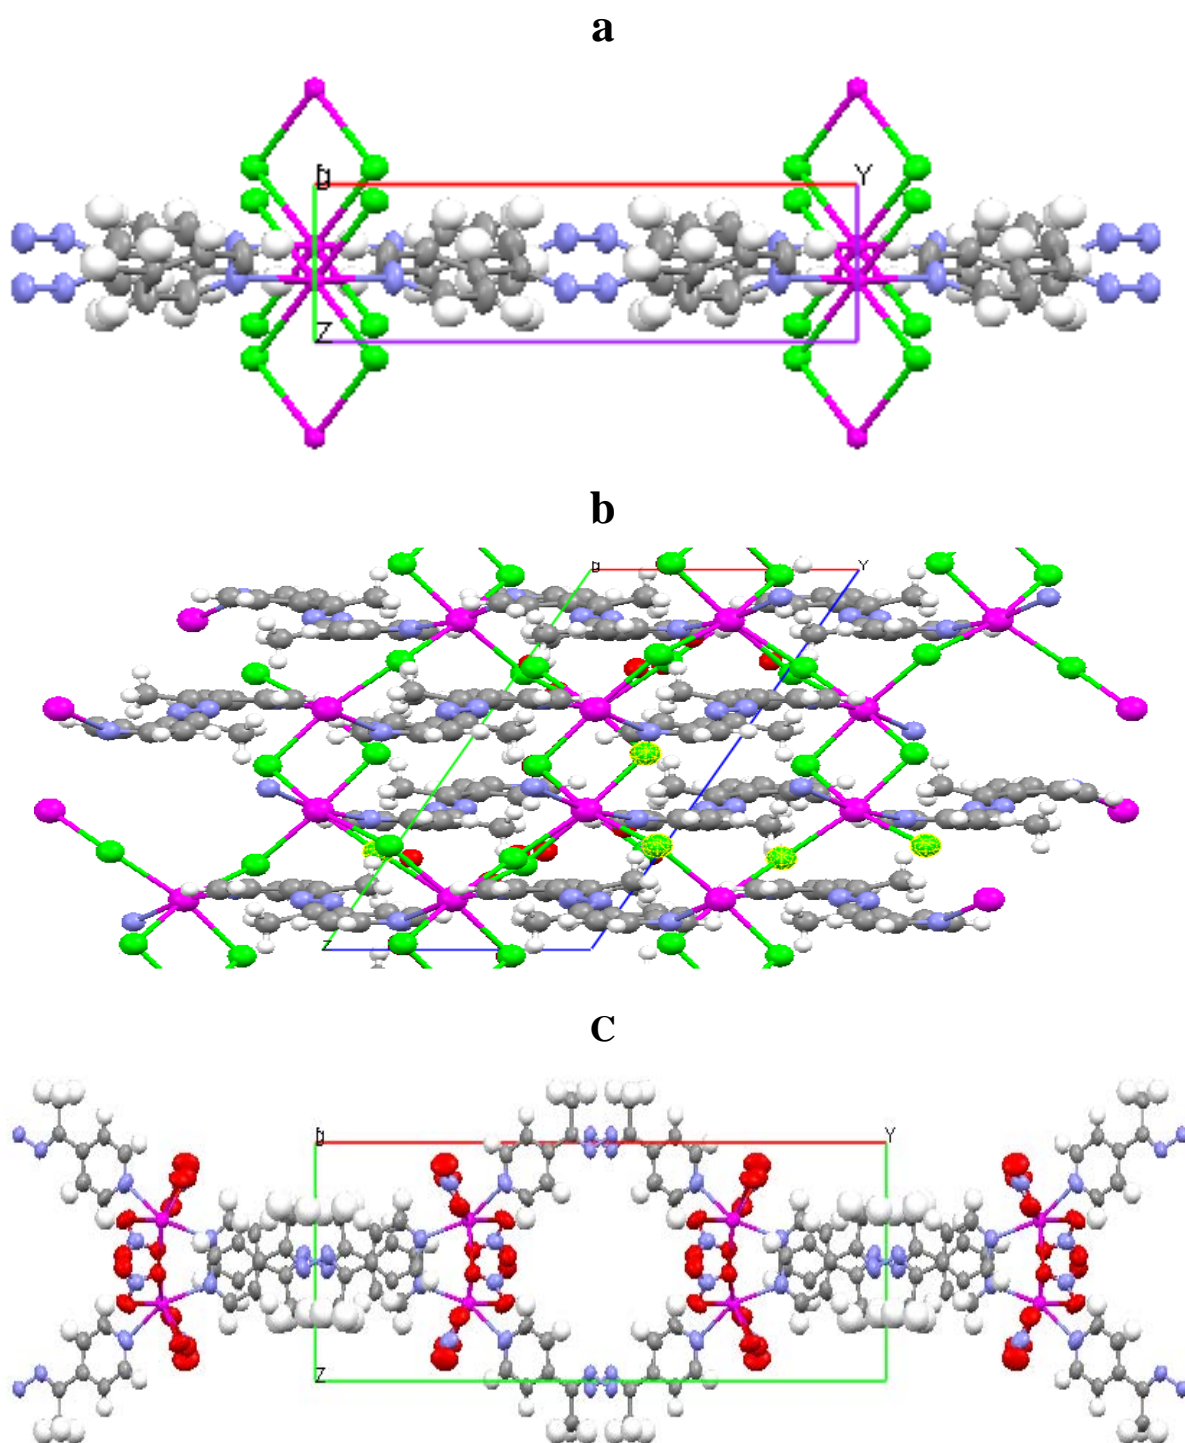

**Fig. S1** The coordination environments and unit cell of (a) compound  $[\text{Pb}(4\text{-bpdh})(\text{Br})_2]_n$  (**1**) (b) compound  $[\text{Pb}(4\text{-bpdh})(\text{Br})(\text{NO}_3)]_n$  (**2**) and (c) compound  $[\text{Pb}(4\text{-bpdh})(\text{NO}_3)_2(\text{H}_2\text{O})]_n$  (**3**) (Pb= violet, O = red, C = gray and N= blue Br= green and H=white).

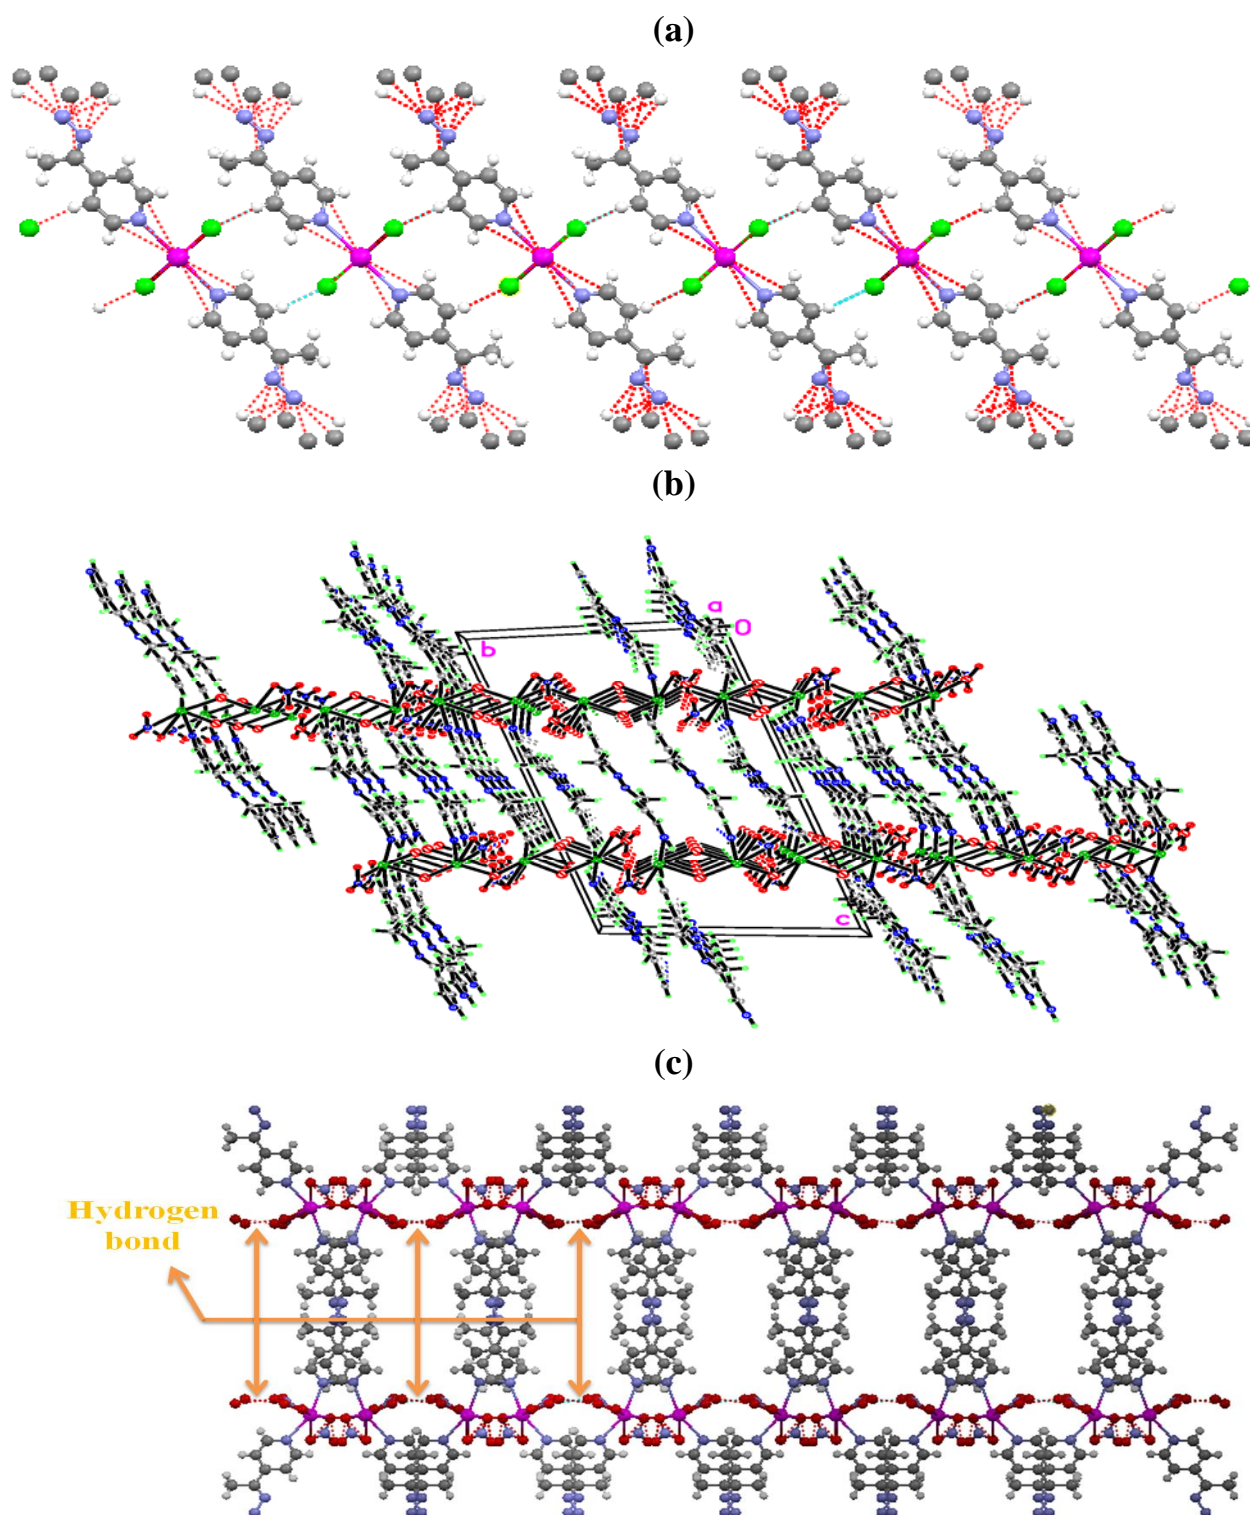

**Fig. S2** A schematic diagram illustrating the interactions in polymeric chains of (a) compound **1** and (b) compound **2** and (c) compound **3**, (Pb= violet, O = red, C = gray and N= blue Br= green and H=white)



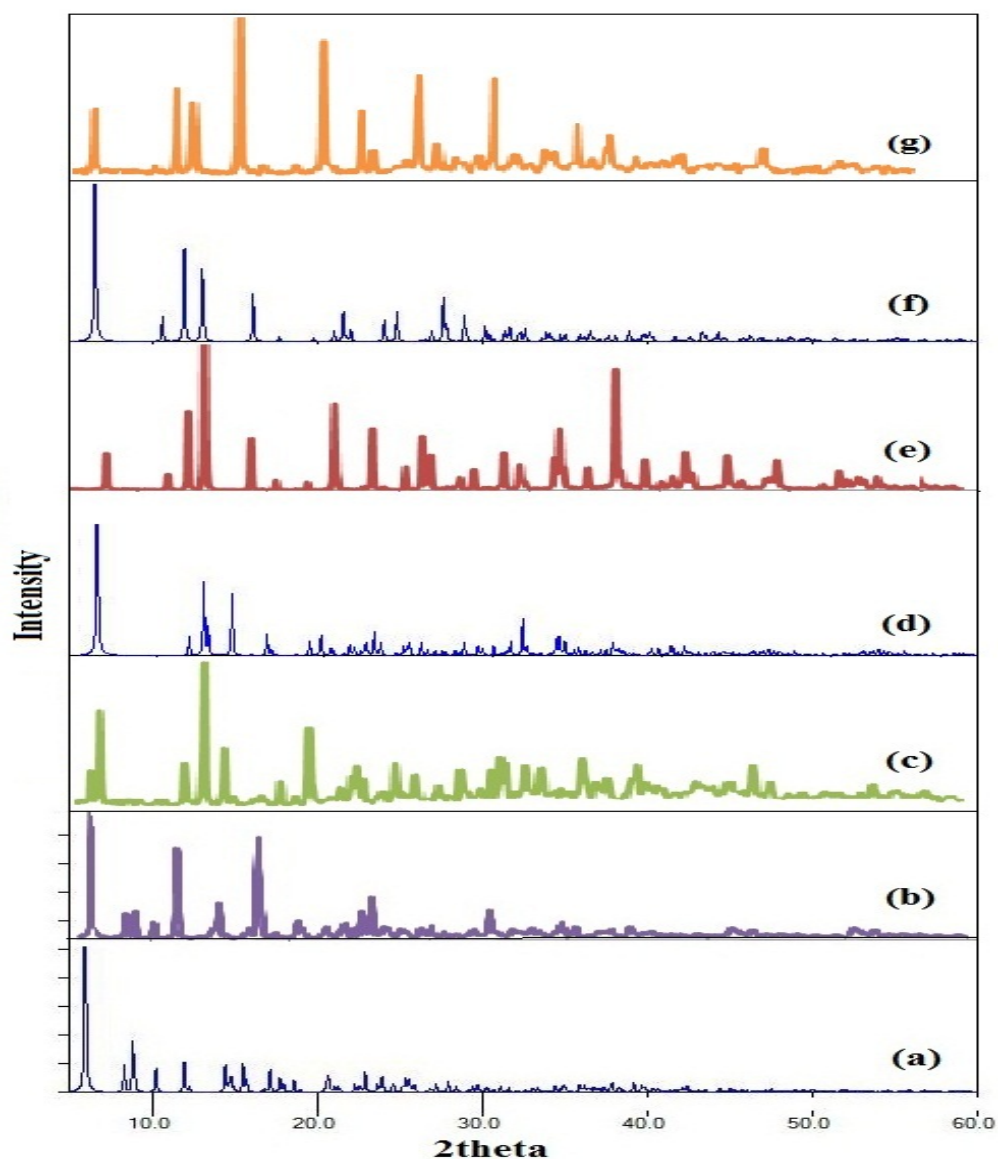

**Fig. S3** The XRD patterns of (a) simulated from single crystal X-ray data of compound **3**, (b) bulk materials as synthesized of compound **3**, (c) bulk materials obtained by solid state anion-replacement of compound **3** with 1 mmol KBr, (d) simulated from single crystal X-ray data of compound **2**, (e) bulk materials obtained by solid state anion-replacement of compound **2** with 1 mmol KBr, and (f) simulated from single crystal X-ray data of compound **1**, (g) compound **1** obtained by solid state anion-replacement of compound **3** with 2 mmol KBr.

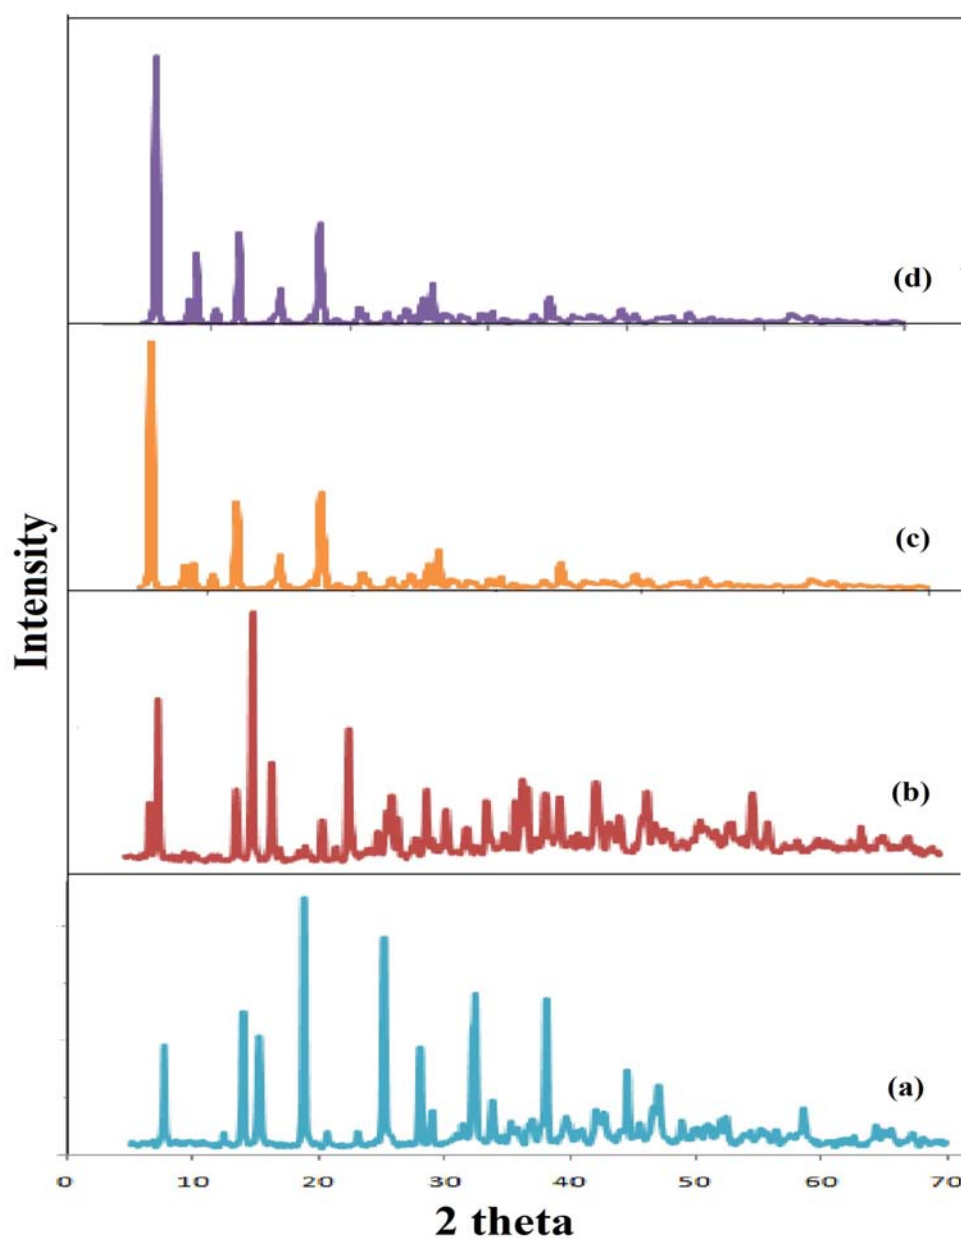

**Fig. S4** The XRD patterns of (a) compound **1** that obtained by solid state anion-replacement of compound **3** with 2 mmol KBr (b) compound **2** obtained by solid state anion-replacement of compound **1** with 1 mmol NaNO<sub>3</sub>, (c) compound **3** obtained by solid state anion-replacement of compound **2** with 1 mmol NaNO<sub>3</sub>, (d) compound **3** obtained by solid state anion-replacement of compound **1** with 2 mmol NaNO<sub>3</sub>.



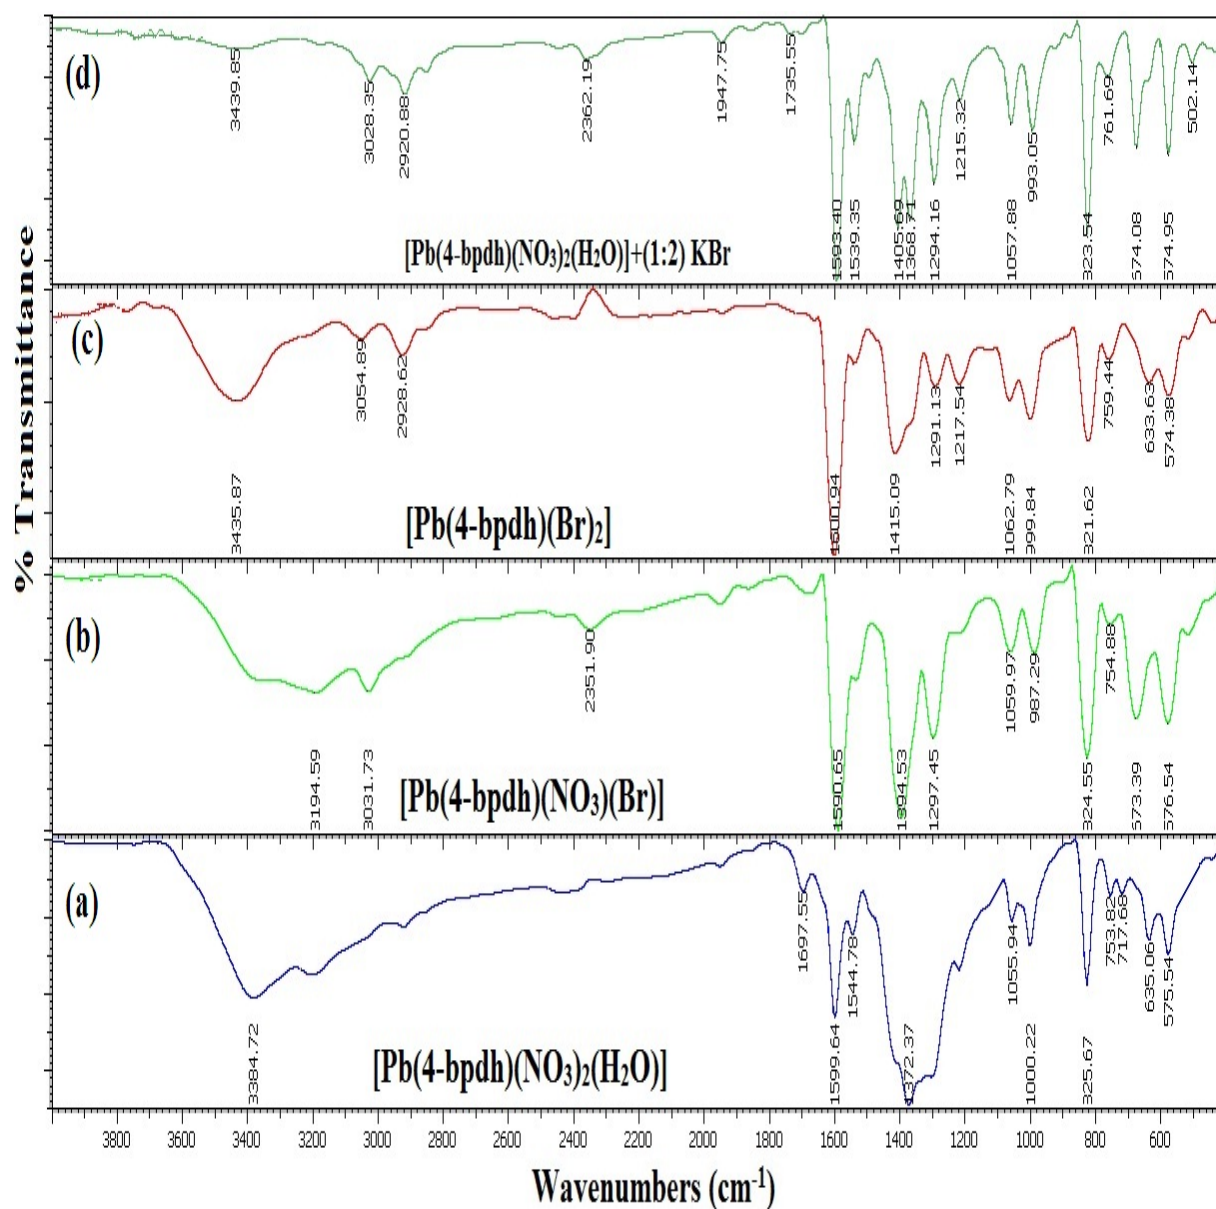

**Fig. S5** IR spectra of (a) compound **3**, (b) bulk materials obtained by solid state anion-replacement of compound **3** by grinding with 1 mmol KBr, (c) bulk materials obtained by solid state anion-replacement of compound **2** by grinding with 1 mmol KBr and (d) bulk materials obtained by solid state anion-replacement of compound **1** by grinding with 2 mmol KBr.

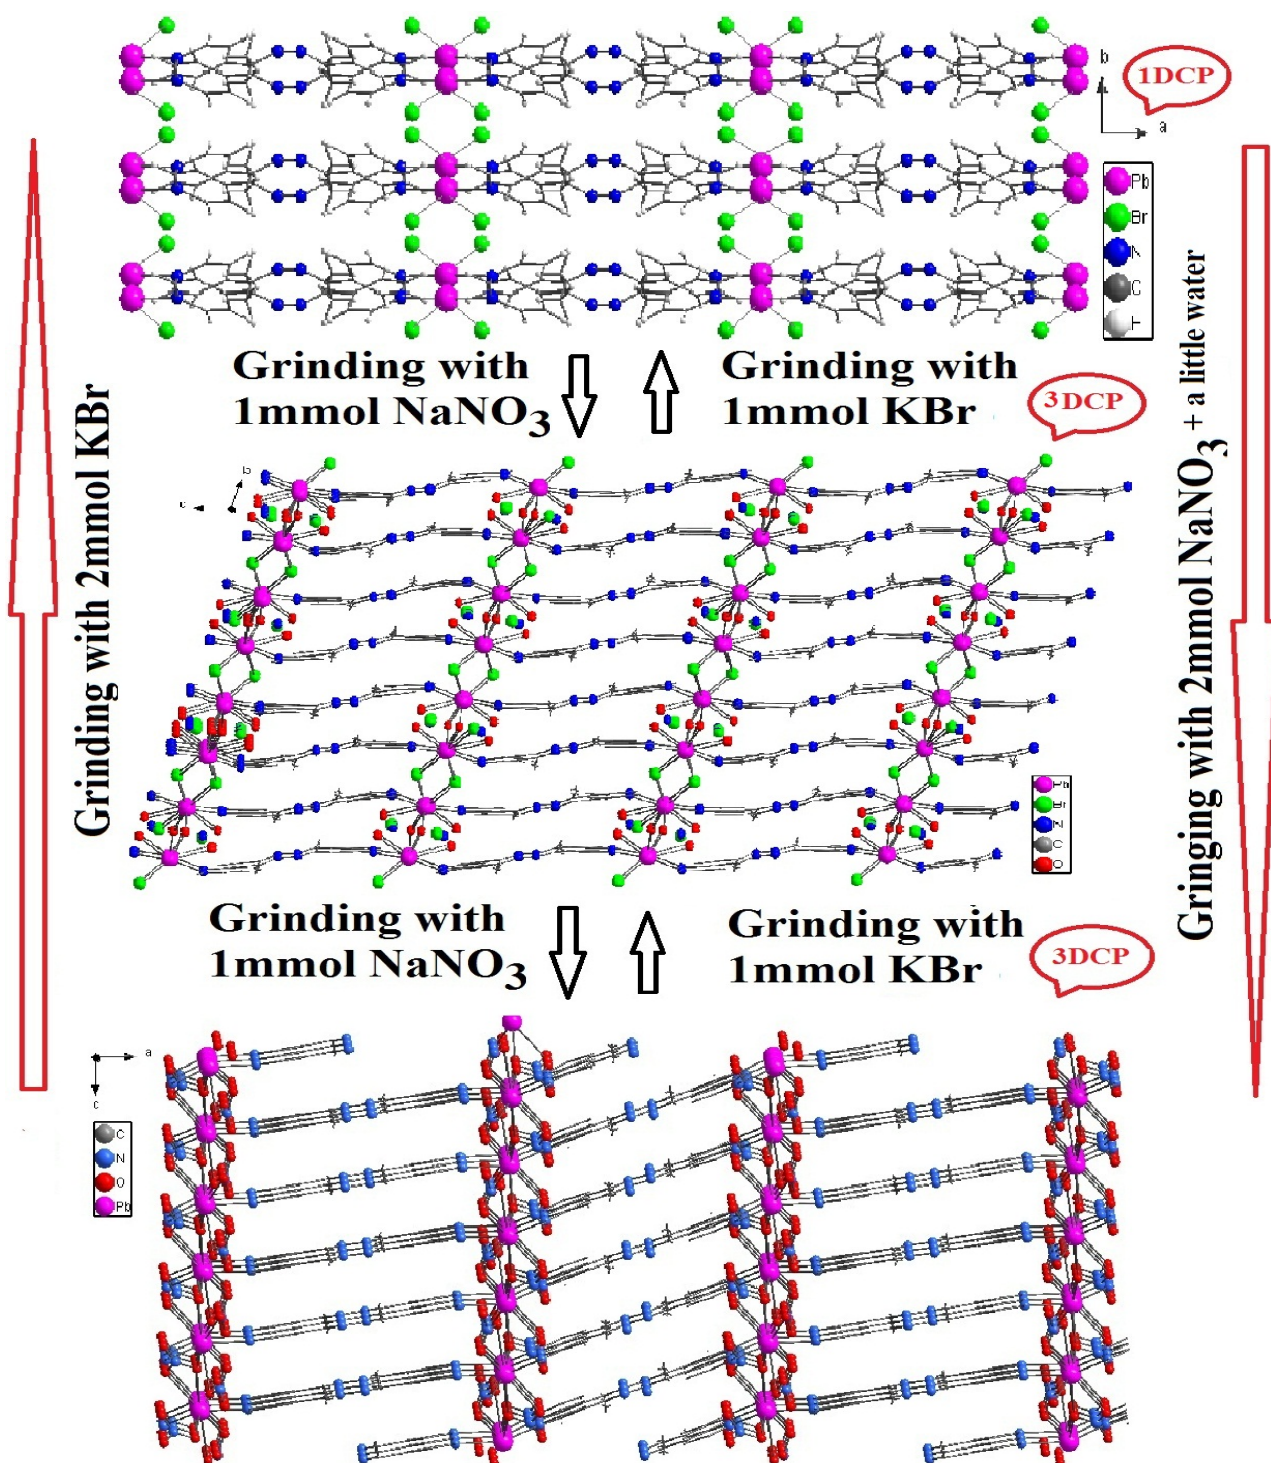

**Fig. S6** A schematic diagram illustrating the structural conversions from 1D coordination polymer **1** (up) to 2D coordination polymers **2** (middle) and 3D coordination polymer **3** (bottom) by solid state reversible anion-replacement.

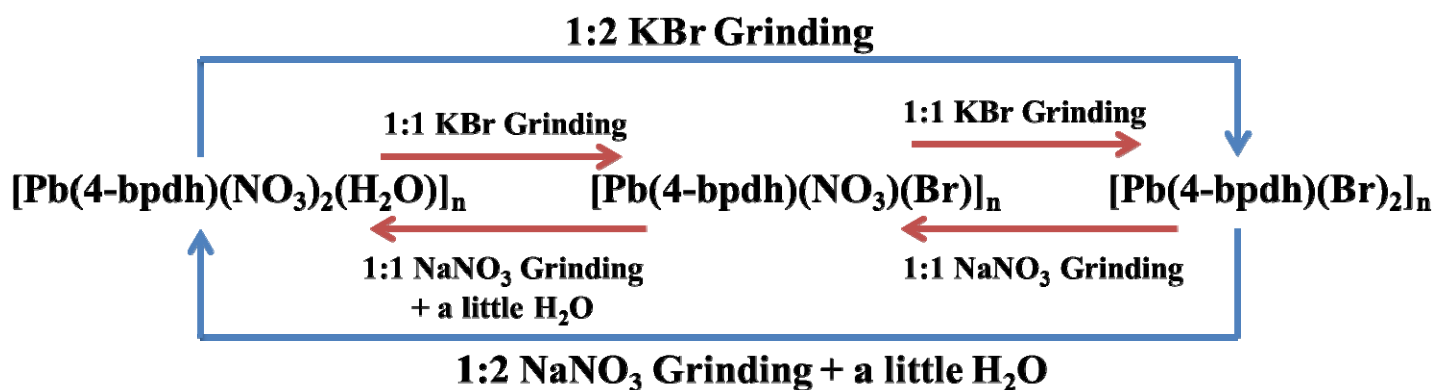

**Fig. S7** schematic diagram for this Solid State Crystal to Crystal Conversions.

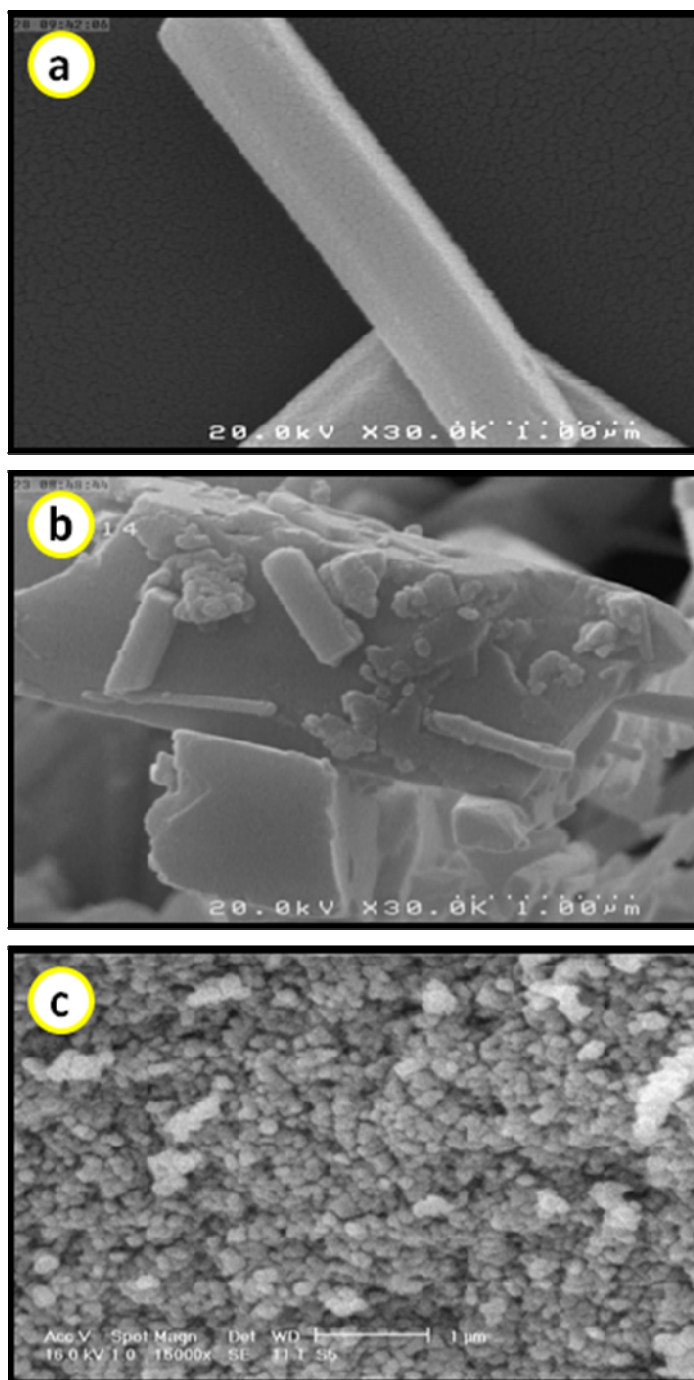

**Fig. S8** SEM images for as synthesized (a) compound 1, (b) compound 2 and (c) compound 3;  
before thermolysis.

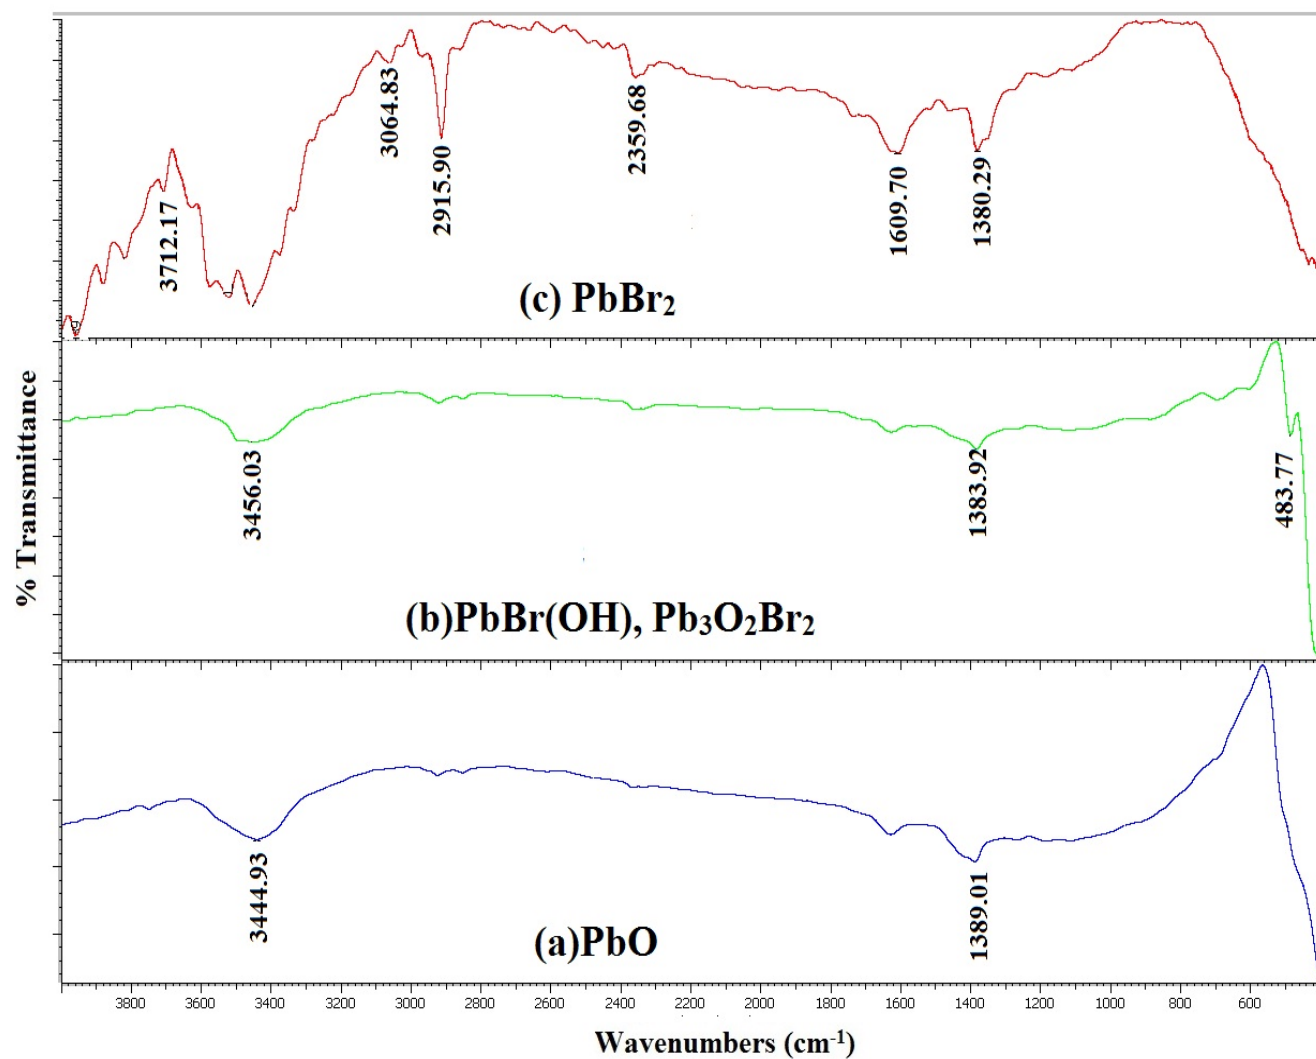

**Fig. S9** IR data for (a) PbO, (b) (PbBr(OH), Pb<sub>3</sub>O<sub>2</sub>Br<sub>2</sub>) and (c) PbBr<sub>2</sub> nanoparticles.



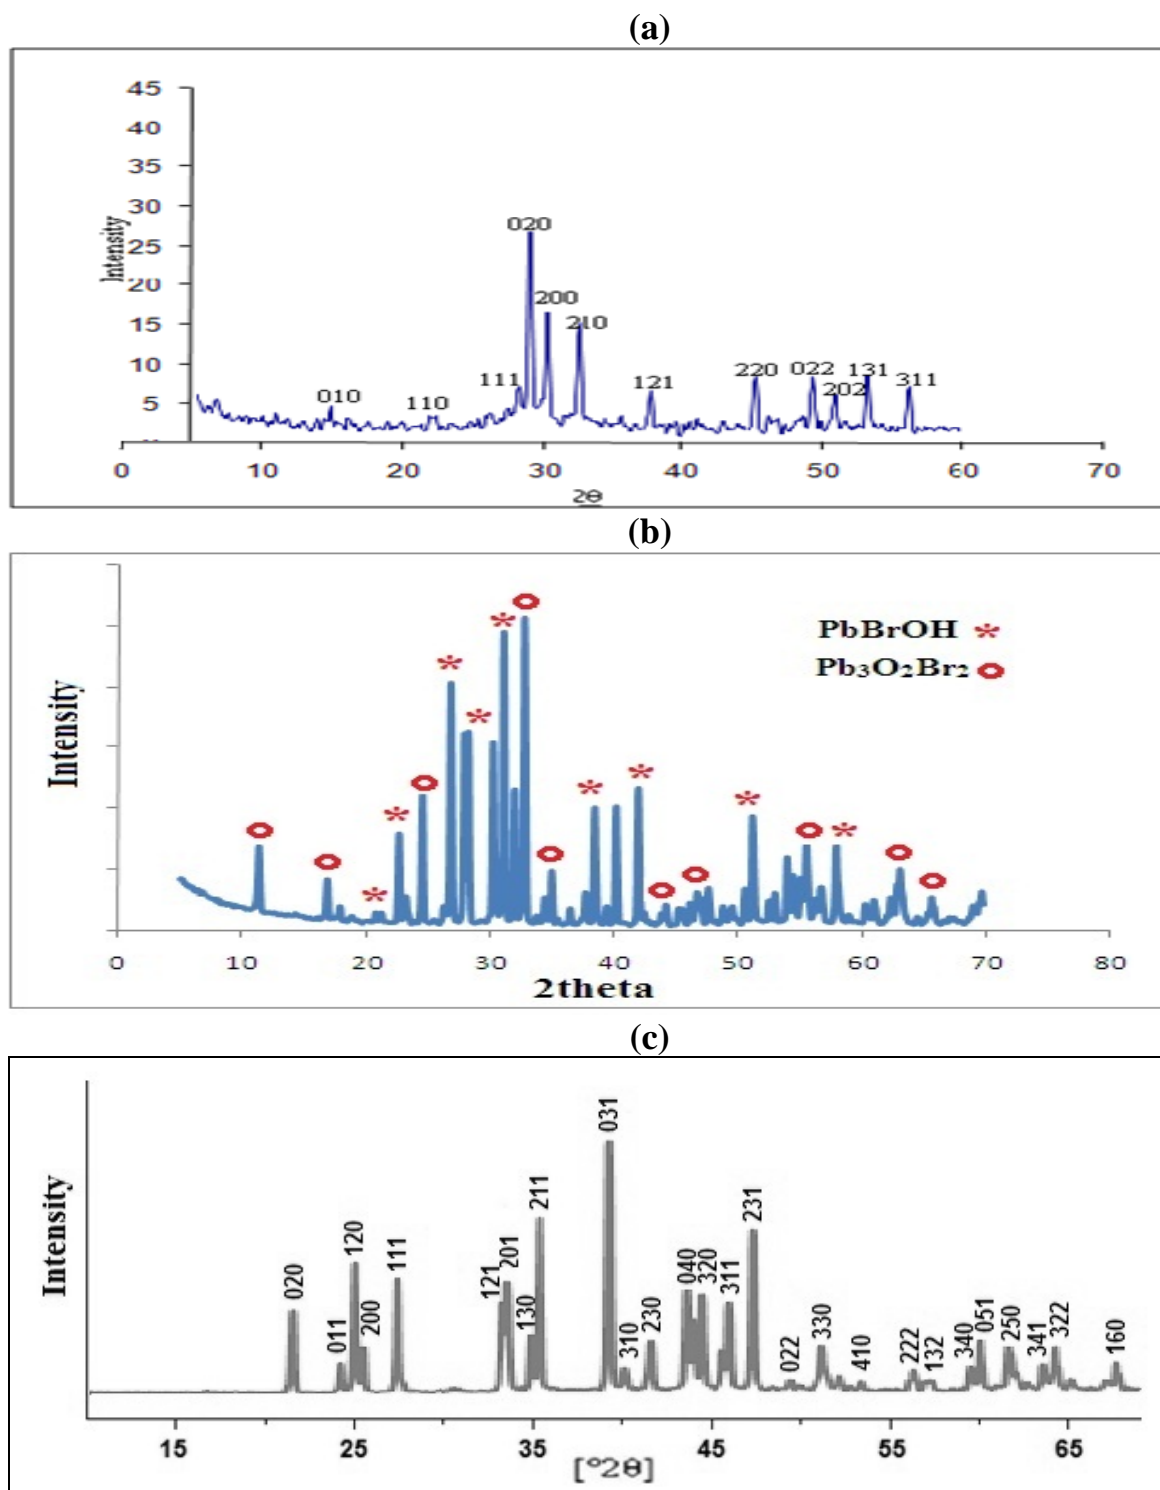

**Fig. S10** XRD patterns of (a) PbO, (b) (PbBr(OH), Pb<sub>3</sub>O<sub>2</sub>Br<sub>2</sub>) and (c) PbBr<sub>2</sub> nanoparticles prepared by thermolysis of compounds **1**, **2** and **3** in oleic acid at 180 °C under air atmosphere for 2 h, respectively.
